# Supplementary material
Source: bioRxiv or medRxiv preprint supplement (http://medrxiv.stage.highwire.org/highwire/filestream/69077/field_highwire_adjunct_files/6/19006221-5.pdf)
Supplement: Supplementary file [file 19006221-5.pdf]

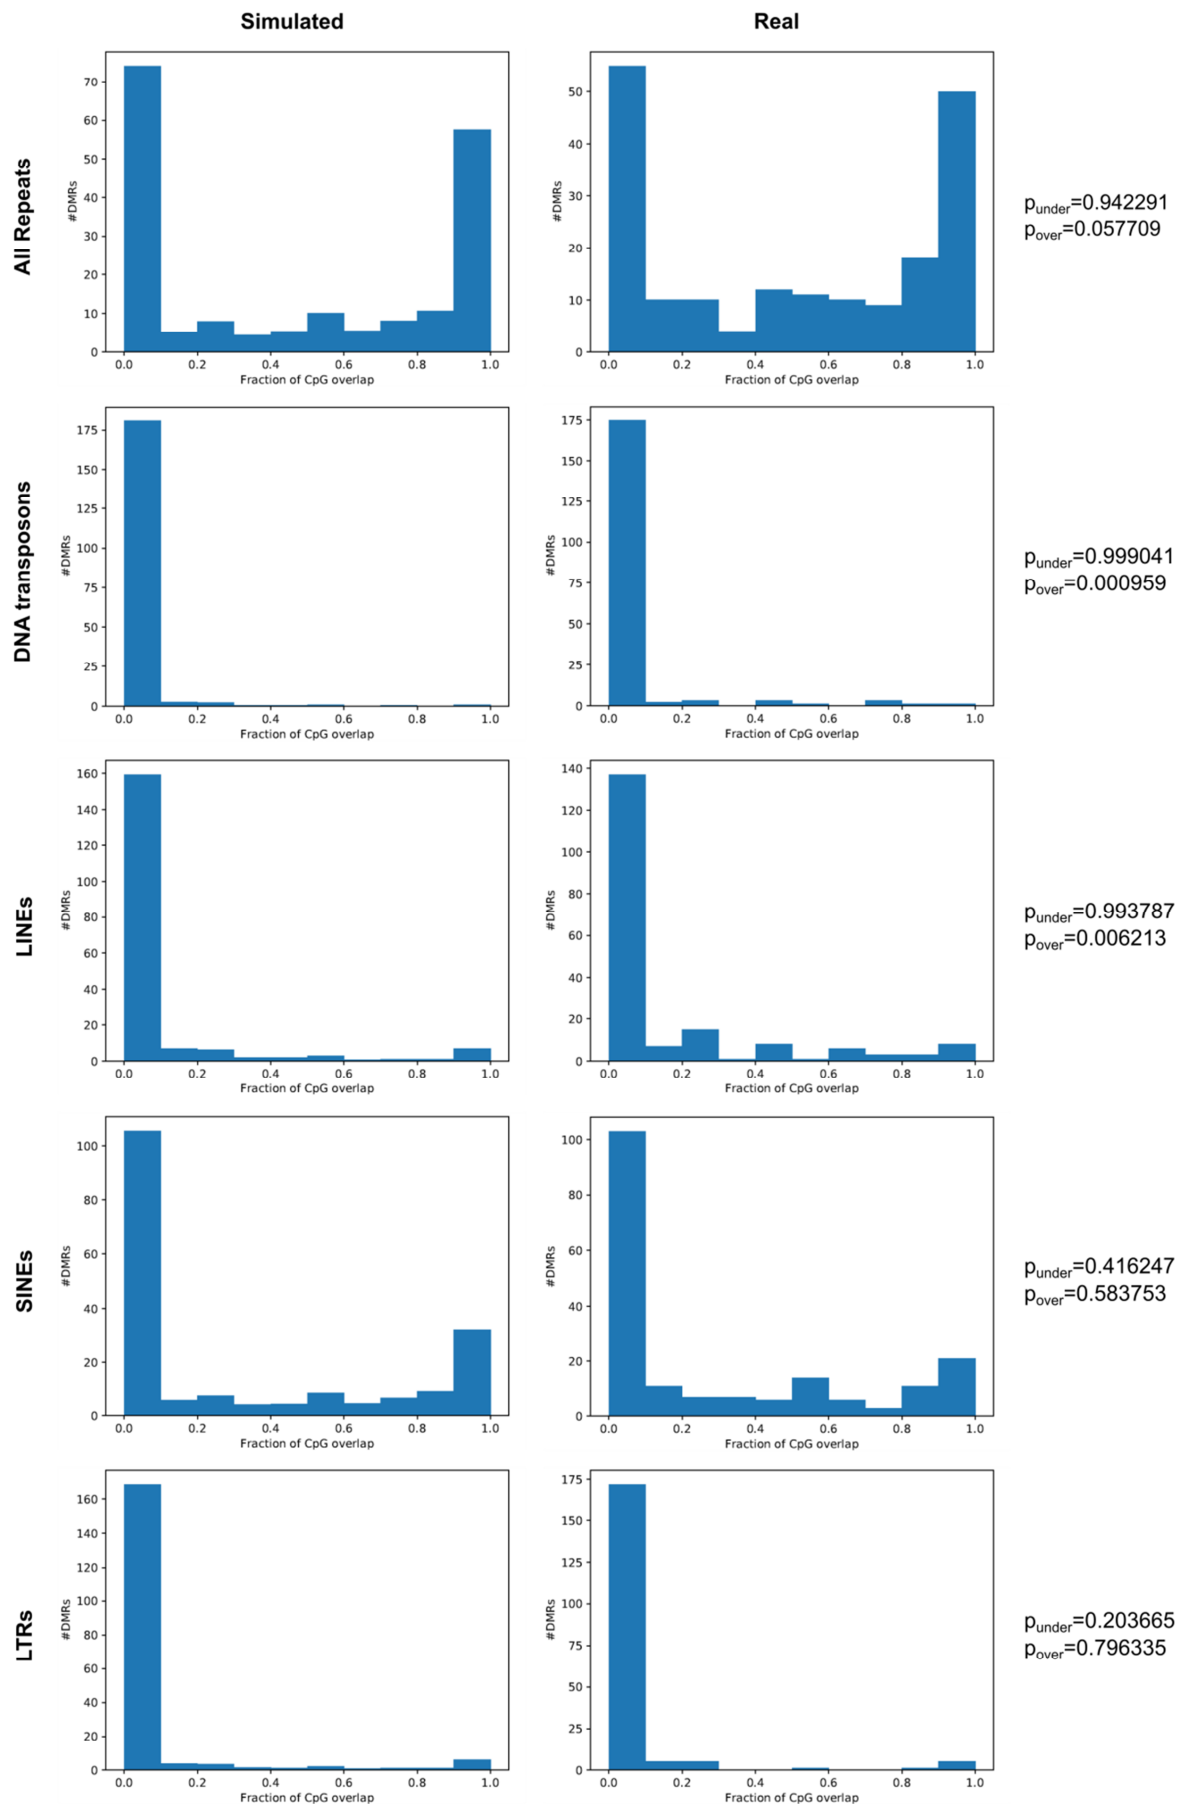

**Fig. S5.** Overlap of DMRs with repeat elements in the genome (all repeats, DNA transposons, LINEs – long interspersed nuclear elements, SINEs – short interspersed nuclear elements, and LTRs – long terminal repeats). Empirical p values for under- and over-representation in the dataset, compared to 1 million simulated datasets, were estimated. Only LINEs and DNA transposons were significantly over-represented in our dataset.
